# Supplementary material for: Randomised feasibility study of a novel experience-based internet intervention to support self-management in chronic asthma
Source: PubMed Central journal article supplement — BMJ Open. 2016 Dec 26;6(12):e013401. doi: 10.1136/bmjopen-2016-013401 (PMC5223671; doi:10.1136/bmjopen-2016-013401), 2016-12-26
Supplement: bmjopen-2016-013401supp2.pdf [file bmjopen-2016-013401supp2.pdf]

# Randomized Feasibility Study of a Novel Experience-Based Internet Intervention to Support Self- Management in Chronic Asthma

Online portal

# Study design

Patient information sheet and consent form sent to eligible participants

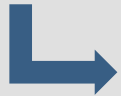

Signed consent form received by trial office

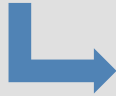

Participant details entered into online trial portal

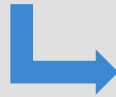

Invitation to complete baseline questionnaires

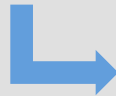

Randomised to active or comparator website

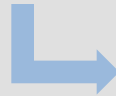

2 weeks access to website

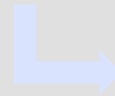

Invitation to complete follow up questionnaires

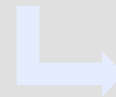

Qualitative interviews

# What is the portal?

An online interactive interface

Three elements

- (1) Trial Management web pages
- (2) Participant online questionnaires
- (3) Back end (programming code supporting the design and functionality)

# Purpose of the portal

- Data collection & storage facility
- Entering participants into the study
- Following progress of study participants
- Participant data – questionnaire responses and website usage
- Data downloads

# Welcome screen

EXPERT Trial Portal

[Home](#)

[Trial Participants](#)

[Ratings & Comments](#)

[Participant Usage Tracking](#)

[Test Participant Status & Emails](#)

Logged in as **super**

[Log out](#)

## Welcome to the Expert Trial Portal Server

### Please log in

Username

Password

[Log in](#)

#### Developer note:

There are three types of login:

- **Trial manager** Can create and manage Trial Participants
- **Independent reviewer** Can view tracking, ratings and comment information
- **"Super user"** Can see all parts of the system, and can perform extra administration tasks on participants

There is currently one test login for each of these types of user:

 **Trial Manager**  
Username: *trial*, Password: \*\*\*\*\*

 **Independent reviewer**  
Username: *review*, Password: \*\*\*\*\*

 **Super User**  
Username: *super*, Password: \*\*\*\*\*

# Management Interface

EXPERT Trial Portal

Home

Trial Participants

Ratings & Comments

Participant Usage Tracking

Test Participant Status & Emails

Logged in as **super**

Log out

**Welcome to the EXPERT Trial Portal** Tuesday, 02 October 2012

Use the black ribbon above or the green buttons below to navigate around the site.

 [Manage Trial Participants](#)

Trial Manager

 [Ratings & Comments](#)

Independent Reviewer

 [Participant Usage Tracking](#)

Independent reviewer

© 2012 University of Oxford

For technical queries and support contact Codeface Ltd via ✉ [expert-trial-support@codeface.com](mailto:expert-trial-support@codeface.com)

# Trial participants

## Trial Participants

Below is a list of Trial Participants. To recruit a new participant, use the new participant link. Once the participant has completed the baselines the baseline measure responses will be viewable here.

Trial Participants [Test Participants](#)

[+ New Trial Participant](#)

[Download Participants csv](#)

Total number of participants: **376** (smoking: **129** , asthma: **200** , ms: **47** )

| Welcome code ▲ | Condition            | Name / Email  | Baseline :<br>Invite sent | Started        | Randomised     | Followup:<br>Invited | Completed      |        |
|----------------|----------------------|---------------|---------------------------|----------------|----------------|----------------------|----------------|--------|
| S5433VX        | smoking intervention | Iqbal Hashmat | ✓ 31 Jul 11:59            | ✓ 31 Jul 19:25 | ✓ 31 Jul 19:36 | ✓ 14 Aug 20:03       | ✓ 14 Aug 20:40 | Show ▾ |
| M5428YT        | ms intervention      |               | ✓ 31 Jul 11:56            | ✓ 01 Aug 22:03 | ✓ 01 Aug 22:19 | ✓ 15 Aug 23:03       |                | Show ▾ |
| M541K51        | ms intervention      |               | ✓ 23 Jul 16:04            | ✓ 23 Jul 21:56 | ✓ 23 Jul 22:06 | ✓ 06 Aug 23:03       | ✓ 07 Aug 08:46 | Show ▾ |
| M5409FS        | ms intervention      |               | ✓ 23 Jul 15:59            | ✓ 03 Aug 14:45 | ✓ 03 Aug 18:02 | ✓ 17 Aug 18:03       | ✓ 25 Aug 12:52 | Show ▾ |
| S5395HP        | smoking control      |               | ✓ 17 Jul 09:21            | ✓ 17 Jul 11:09 | ✓ 17 Jul 11:29 | ✓ 31 Jul 12:03       | ✓ 31 Jul 17:45 | Show ▾ |
| M5387LS        | ms intervention      |               | ✓ 16 Jul 10:26            | ✓ 17 Jul 14:50 | ✓ 17 Jul 15:16 | ✓ 31 Jul 16:03       | ✓ 01 Aug 17:43 | Show ▾ |
| S5374VH        | smoking intervention |               | ✓ 16 Jul 10:23            | ✓ 16 Jul 17:53 | ✓ 16 Jul 18:05 | ✓ 30 Jul 19:03       | ✓ 01 Aug 15:44 | Show ▾ |
| S536SPW        | smoking control      |               | ✓ 10 Jul 15:53            | ✓ 16 Jul 23:06 | ✓ 16 Jul 23:34 | ✓ 31 Jul 00:03       | ✓ 31 Jul 18:42 | Show ▾ |
| S5353WV        | smoking control      |               | ✓ 08 Jul 14:18            | ✓ 15 Jul 17:12 | ✓ 15 Jul 17:28 | ✓ 29 Jul 18:03       | ✓ 01 Aug 19:57 | Show ▾ |

# Trial participants – latest visits

Latest visits

[Visits by user](#)

## User Activity Latest visits

Developers' note: User tracking events are stored on the content sites in encrypted form and collected periodically and decrypted using the private key stored here on the trial server.

Synchronise with the content server

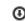

Download CSV:

User Visits

Page Visits

| User code | Random Group | Date of visit     | Time of visit                    | Javascript? |               |
|-----------|--------------|-------------------|----------------------------------|-------------|---------------|
| STAFF     |              | November 27, 2014 | 17:30 → 17:46 00:16:09 no logout | ✓           | 6 page views  |
| STAFF     |              | November 27, 2014 | 14:49 → 15:06 00:16:51 no logout | ✓           | 17 page views |
| STAFF     |              | November 24, 2014 | 16:19 → 16:41 00:22:47 no logout | ✓           | 2 page views  |
| STAFF     |              | November 13, 2014 | 11:54 → 11:58 00:03:17 no logout | ✓           | 9 page views  |
| STAFF     |              | November 12, 2014 | 16:54 → 17:42 00:48:42 no logout | ✓           | 4 page views  |
| STAFF     |              | November 12, 2014 | 14:53 → 16:17 01:24:24 no logout | ✓           | 8 page views  |
| STAFF     |              | November 12, 2014 | 13:55 → 13:55 00:00:14 no logout | ✓           | 2 page views  |
| STAFF     |              | November 12, 2014 | 12:02 → 12:05 00:02:32 no logout | ✓           | 2 page views  |
| STAFF     |              | November 11, 2014 | 15:46 → 15:46 00:00:09 no logout | ✓           | 1 page views  |
| STAFF     |              | November 10, 2014 | 14:27 → 14:52 00:24:51 no logout | ✓           | 9 page views  |
| STAFF     |              | November 10, 2014 | 11:00 → 12:18 01:17:28 no logout | ✓           | 8 page views  |
| STAFF     |              | November 5, 2014  | 09:59 → 10:59 00:59:24 no logout | ✓           | 12 page views |
| STAFF     |              | November 4, 2014  | 16:54 → 17:11 00:16:58 no logout | ✓           | 5 page views  |
| STAFF     |              | November 4, 2014  | 15:50 → 16:16 00:25:54 no logout | ✓           | 7 page views  |



# Trial participants – activity by user (i)

Latest visits **Visits by user**

## User Activity Visits by user

| User code                                                                                   | Number of visits |
|---------------------------------------------------------------------------------------------|------------------|
|  M16682S   | 6 visits         |
|  M1673PE   | 2 visits         |
|  S168FAD   | 3 visits         |
|  A170G9K   | 2 visits         |
|  A173GBK   | 1 visits         |
|  A17515O   | 3 visits         |
|  A176PDM   | 4 visits         |
|  A177RNS   | 3 visits         |
|  A178ZAE | 2 visits         |
|  M180QI5 | 6 visits         |
|  M18154O | 4 visits         |
|  S183A91 | 1 visits         |
|  A184RJN | 4 visits         |
|  S185AI4 | 3 visits         |

# Trial participants – activity by user (ii)

Latest visits Visits by user

## User Activity Visits for M16682S

| Date of visit   | Time of visit                     | Javascript? |                               |
|-----------------|-----------------------------------|-------------|-------------------------------|
| 📅 June 17, 2013 | 🕒 16:26 → 🕒 16:28 <b>00:02:00</b> | ✓           | <a href="#">2 page views</a>  |
| 📅 June 17, 2013 | 🕒 09:52 → 🕒 09:54 <b>00:01:26</b> | ✓           | <a href="#">1 page views</a>  |
| 📅 June 17, 2013 | 🕒 09:47 → 🕒 09:51 <b>00:04:07</b> | ✓           | <a href="#">11 page views</a> |
| 📅 June 17, 2013 | 🕒 09:29 → 🕒 <b>00:07:31</b>       | ✓           | <a href="#">6 page views</a>  |
| 📅 June 15, 2013 | 🕒 15:13 → 🕒 15:13 <b>00:00:19</b> | ✓           | <a href="#">1 page views</a>  |
| 📅 June 15, 2013 | 🕒 15:09 → 🕒 15:12 <b>00:03:23</b> | ✓           | <a href="#">1 page views</a>  |

© 2013 University of Oxford  
For technical queries and support contact Codeface Ltd via ✉ [expert-trial-support@codeface.com](mailto:expert-trial-support@codeface.com)

# Intervention site – media viewed

|                                                    |                            |                             |                  |                                                               |
|----------------------------------------------------|----------------------------|-----------------------------|------------------|---------------------------------------------------------------|
| 🏠                                                  | 📅 27 Jun 🕒 20:58 → 🕒 20:59 | 🕒 00:00:09                  |                  |                                                               |
| health-professionals/health-professionals-talk-... | 📅 27 Jun 🕒 20:59 → 🕒 20:59 | 🕒 00:00:26                  |                  |                                                               |
| giving-smoking-getting-started-0                   | 📅 27 Jun 🕒 20:59 → 🕒 21:00 | 🕒 00:00:36                  |                  |                                                               |
| professor-aveyard-talks-about-why-people-start-... | 📅 27 Jun 🕒 21:00 → 🕒 21:04 | 🕒 00:03:56                  | ▶ GUSPROF_01.mp4 | 🕒 20:59 → 🕒 21:01<br>▶ 02:10 (100%)<br>00:00 ██████████ 02:09 |
| giving-smoking-getting-started-0                   | 📅 27 Jun 🕒 21:04 → 🕒 21:16 | 🕒 00:12:46                  |                  |                                                               |
| professor-aveyard-explains-why-some-people-cont... | 📅 27 Jun 🕒 21:04 → 🕒 21:07 | 🕒 00:03:06                  | ▶ GUSPROF_02.mp4 | 🕒 21:03 → 🕒 21:06<br>▶ 02:33 (100%)<br>00:00 ██████████ 02:33 |
| professor-aveyard-describes-evidence-why-smokin... | 📅 27 Jun 🕒 21:07 → 🕒 21:09 | 🕒 00:01:13                  | ▶ GUSPROF_03.mp4 | 🕒 21:06 → 🕒 21:07<br>▶ 00:57 (100%)<br>00:00 ██████████ 00:57 |
| professor-aveyard-talks-about-how-behavioural-p... | 📅 27 Jun 🕒 21:09 → 🕒 21:11 | 🕒 00:02:19                  | ▶ GUSPROF_04.mp4 | 🕒 21:08 → 🕒 21:10<br>▶ 01:54 (103%)<br>00:00 ██████████ 01:49 |
| professor-aveyard-explains-why-it-difficult-giv... | 📅 27 Jun 🕒 21:11 → 🕒 21:13 | 🕒 00:02:09                  | ▶ GUSPROF_05.mp4 | 🕒 21:10 → 🕒 21:12<br>▶ 01:54 (100%)<br>00:00 ██████████ 01:54 |
| professor-aveyard-talks-about-why-it-important-... | 📅 27 Jun 🕒 21:14 → 🕒 21:16 | 🕒 00:02:19                  | ▶ GUSPROF_11.mp4 | 🕒 21:13 → 🕒 21:15<br>▶ 01:55 (100%)<br>00:00 ██████████ 01:54 |
| motivations-quit                                   | 📅 27 Jun 🕒 21:16 → 🕒 21:26 | 🕒 00:09:17                  |                  |                                                               |
| gp-explains-what-health-and-social-benefits-are... | 📅 27 Jun 🕒 21:17 → 🕒 21:18 | 🕒 00:01:27                  | ▶ GUS_GP_03.mp4  | 🕒 21:16 → 🕒 21:17<br>▶ 01:05 (100%)<br>00:00 ██████████ 01:05 |
| professor-aveyard-explains-why-it-important-sto... | 📅 27 Jun 🕒 21:18 → 🕒 21:20 | 🕒 00:01:42                  | ▶ GUSPROF_07.mp4 | 🕒 21:18 → 🕒 21:19<br>▶ 01:15 (103%)<br>00:00 ██████████ 01:13 |
| professor-aveyard-explains-why-it-important-sto... | 📅 27 Jun 🕒 21:21 → 🕒 21:21 | 🕒 00:00:51                  | ▶ GUSPROF_07.mp4 | 🕒 21:20 → 🕒 21:20<br>▶ 00:24 (33%)<br>00:00 ████████ 01:13    |
| professor-aveyard-explains-why-it-important-sto... | 📅 27 Jun 🕒 21:21 → 🕒 21:21 | 🕒 00:00:56 <i>estimated</i> |                  |                                                               |

# Participant page ratings

Participant page ratings

[Participant comments](#)

## Participant Ratings Latest ratings received

This page provides a summary of the most recent page ratings submitted by participants in the EXPERT Trial.

Developers' note: These are stored on the Patient Experience sites in encrypted form and collected periodically and decrypted using the private key stored here on the trial server.

Synchronise with the content server

[Download Ratings CSV](#)

| Date                | Participant | Rating | URL                                                                         |
|---------------------|-------------|--------|-----------------------------------------------------------------------------|
| July 24, 2014 17:07 | S536SPW     | 5      | help-and-support-stop-smoking/10-myths-about-stop-smoking-treatments        |
| July 24, 2014 17:07 | S536SPW     | 4      | help-and-support-stop-smoking/10-myths-about-stop-smoking-treatments        |
| July 24, 2014 17:07 | S536SPW     | 3      | help-and-support-stop-smoking/what-do-if-you-relapse-after-quitting-smoking |
| July 24, 2014 17:06 | S536SPW     | 5      | giving-smoking-getting-started/stop-smoking---coping-cravings               |
| July 24, 2014 17:06 | S536SPW     | 5      | giving-smoking-getting-started/self-help-tips-help-you-stop-smoking         |
| July 24, 2014 17:06 | S536SPW     | 5      | reasons-quit/7-key-times-quit-smoking                                       |
| July 24, 2014 17:05 | S536SPW     | 5      | reasons-quit/10-health-benefits-stopping-smoking                            |
| July 24, 2014 17:04 | S536SPW     | 5      | ↑                                                                           |
| July 24, 2014 17:04 | S536SPW     | 5      | ↑                                                                           |
| July 23, 2014 09:45 | S5395HP     | 4      | ↑                                                                           |
| July 19, 2014 23:30 | S5395HP     | 3      | ↑                                                                           |
| July 10, 2014 17:19 | M533JVI     | 2      | ↑                                                                           |

# Participant comments

[Participant page ratings](#)

[Participant comments](#)

## Participant Comments Comment details

|                             |                                           |
|-----------------------------|-------------------------------------------|
| From (Name of participant): | Nigel Brooks                              |
| Email:                      | <input type="text"/>                      |
| Participant Trial Code:     | S460MG4                                   |
| URL being commented on:     | munir                                     |
| Participant's comments:     | Key page. Bullet points rather than text. |

[← Back to list](#)

© 2013 University of Oxford

For technical queries and support contact Codeface Ltd via [✉ expert-trial-support@codeface.com](mailto:expert-trial-support@codeface.com)
