# Supplementary material for: Randomised feasibility study of a novel experience-based internet intervention to support self-management in chronic asthma
Source: PubMed Central journal article supplement — BMJ Open. 2016 Dec 26;6(12):e013401. doi: 10.1136/bmjopen-2016-013401 (PMC5223671; doi:10.1136/bmjopen-2016-013401), 2016-12-26
Supplement: bmjopen-2016-013401supp3.pdf [file bmjopen-2016-013401supp3.pdf]

# Randomized Feasibility Study of a Novel Experience-Based Internet Intervention to Support Self-Management in Chronic Asthma

Intervention and control website content

# Intervention homepage

Logout My account Select Site

## Living with Asthma



Thames Valley Primary Care Research Partnership 

**HOME**

**EXPERIENCES BY TOPIC**

- What is asthma?
- Symptoms and Causes
- Diagnosis
- Treatment
- Living with asthma

**EXPERIENCES BY TOPIC**

- What is asthma
- Health professionals talk about Asthma
- What is asthma?
- Symptoms and Causes
  - Early signs and symptoms
  - Childhood onset
  - Adult onset
  - Triggers
  - What asthma feels like
  - Changing symptoms over time
- Diagnosis
  - Being diagnosed with asthma
- Treatment
  - Medication and treatment – inhalers
  - Medication and treatment – other treatments
  - Alternative and complementary therapies
  - Managing asthma – reviews and action plans
  - Managing asthma – adjusting medication and other self care strategies
  - Asthma attack and emergencies
  - Dealing with health professionals
  - Remembering to take medication
- Living with asthma
  - Finding information about asthma
  - Emotions and coping
  - Asthma and the workplace
  - Finances and benefits
  - Exercise, diet, weight and other lifestyle issues
  - Support and support groups
  - Relationships, family and friends

**Messages**

- Advice to others
- Messages to health professionals

Home

### Welcome to the Living with Asthma site



About five million people in the UK have asthma, a condition that affects the airways (the tubes carry air in and out of the lungs). People with asthma have sensitive airways which become irritated in some situations, making it more difficult to breathe. Oxford University researchers interviewed 37 people about their experiences of asthma.

We have grouped video and audio extracts from their interviews under 23 topic headings (see above and to the left) which include all of the different experiences in the interviews. You can also find out more about the individuals we talked to by looking at the groupings on the right hand side.



**EXPERIENCES BY GROUP**

Search

- Childhood onset/Adult onset
- Age diagnosed
- Age at interview
- Time since Diagnosis

**HEALTH PROFESSIONALS TALK ABOUT ASTHMA: VIDEO CLIPS**



Click Here...

Glossary

Research conducted by researchers at the University of Oxford, funded by the National Institute for Health Research. Information sources: Asthma UK, NHS Choices, Patient.co.uk, British Thoracic Society and British Lung Foundation.

This site is not intended to be a substitute for medical care. If you need more medical advice, please consult your GP or usual healthcare provider.

# Medication and treatment - summary

## Living with Asthma




Thames Valley Primary Care Research Partnership

**HOME**

**EXPERIENCES BY TOPIC**

**What is asthma**  
 Health professionals talk about Asthma  
 What is asthma?  
**Symptoms and Causes**  
 Early signs and symptoms  
 Childhood onset  
 Adult onset  
 Triggers  
 What asthma feels like  
 Changing symptoms over time

**Diagnosis**  
 Being diagnosed with asthma

**Treatment**  
 Medication and treatment - inhalers  
 Medication and treatment - other treatments  
 Alternative and complementary therapies  
 Managing asthma – reviews and action plans  
 Managing asthma – adjusting medication and other self care strategies  
 Asthma attack and emergencies  
 Dealing with health professionals  
 Remembering to take medication

**Living with asthma**  
 Finding information about asthma  
 Emotions and coping  
 Asthma and the workplace  
 Finances and benefits  
 Exercise, diet, weight and other lifestyle issues  
 Support and support groups  
 Relationships, family and friends

**Messages**  
 Advice to others  
 Messages to health professionals

**EXPERIENCES BY TOPIC**

What is asthma? ▾ Symptoms and Causes ▾ Diagnosis ▾ Treatment ▾ Living with asthma ▾

Home » Medication and treatment - inhalers

**Medication and treatment - inhalers**

Although there's no cure for asthma, there are many treatments available which should enable most people to control their symptoms well and live a normal life. Treatment is based on two important goals

- relief of symptoms
- preventing future symptoms and attacks from developing

Treatments are most commonly given as an inhaler (puffer) or sometimes in tablet form. In this summary we focus on inhalers. Some inhalers are for relief of symptoms (relievers) and there are others, usually inhaled steroids, which are taken every day *whether or not* the person is experiencing symptoms (preventers). While some people may manage their symptoms well with only a reliever or only a preventer inhaler, it is quite common for people to use a combination of treatments. A regular asthma review with a health professional can ensure that the best combination of medication is being used. Asthma can change over time so it's important to keep a regular check on things.

**Reliever inhalers** are the ones that are taken immediately to relieve asthma symptoms. They are bronchodilators, which means they relax the muscles surrounding the narrowed airways (bronchi), making it easier to breathe. Some of these are short acting, their effects last 3-5 hours. They have a variety of different names – most commonly Ventolin (salbutamol) and Bricanyl (terbutaline), although very often people referred to them by their colour (blue). People who have very mild asthma, or whose asthma is only triggered infrequently, sometimes only need to use a reliever inhaler for either immediate relief, or to prevent symptoms in the short term such as before doing some exercise. They work quickly - within about 15 minutes breathing should feel easier. Susan said, "When it works it usually works quite quickly... like it'll usually start improving within a few minutes."



Charles and John have relatively mild asthma and use a minimal amount of medication.



Charles was given a Ventolin inhaler when he was first diagnosed, and was later prescribed a preventer inhaler to use as well. Nowadays he rarely experiences symptoms.





John considers his asthma to be fairly mild and uses his medication mostly in the winter months. His asthma doesn't prevent him from playing rugby at a professional level.



People may use the blue reliever inhaler in conjunction with a **preventer inhaler**, which is an inhaled steroid. The idea of steroids can worry people who associate them with banned substances taken by athletes. As Julie commented, "I did at first wonder about whether they were the same thing as these anabolic steroids that sports people take and was I sort of going to balloon into a great muscley being because I didn't fancy that very much." In fact they are very different, although there can be some side effects (see below). There are a range of different steroid inhalers, including Pulmicort (budesonide) and Clenil Modulle (beclomethasone). They are often brown or orange.

Search

**EXPERIENCES BY GROUP**

- ◀ Gender
- ▶ Childhood onset/Adult onset
- ◀ Age diagnosed
- ◀ Age at interview
- ◀ Time since Diagnosis

**HEALTH PROFESSIONALS TALK ABOUT ASTHMA: VIDEO CLIPS**



Click Here...

Glossary

# Living with asthma – audio & transcript

Logout My account Comment on page Rate page

## Living with Asthma



Thames Valley Primary Care Research Partnership 

**HOME**

**EXPERIENCES BY TOPIC**

What is asthma? Symptoms and Causes Diagnosis Treatment Living with asthma

**EXPERIENCES BY TOPIC**

**What is asthma**

Health professionals talk about Asthma  
What is asthma?

**Symptoms and Causes**

Early signs and symptoms  
Childhood onset  
Adult onset  
Triggers  
What asthma feels like  
Changing symptoms over time

**Diagnosis**

Being diagnosed with asthma

**Treatment**

Medication and treatment - inhalers  
Medication and treatment – other treatments  
Alternative and complementary therapies  
Managing asthma – reviews and action plans  
Managing asthma – adjusting medication and other self care strategies  
Asthma attack and emergencies  
Dealing with health professionals  
Remembering to take medication

**Living with asthma**

Finding information about asthma  
Emotions and coping  
Asthma and the workplace  
Finances and benefits  
Exercise, diet, weight and other lifestyle issues  
Support and support groups  
Relationships, family and friends

**Messages**

Advice to others  
Messages to health professionals

**EXPERIENCES BY TOPIC**

What is asthma? Symptoms and Causes Diagnosis Treatment Living with asthma

Search

**EXPERIENCES BY GROUP**

Gender  
Childhood onset/Adult onset  
Age diagnosed  
Age at interview  
Time since Diagnosis

**HEALTH PROFESSIONALS TALK ABOUT ASTHMA: VIDEO CLIPS**



Click Here...

Glossary

**Living with Asthma**

Lisa was diagnosed aged 12. The asthma nurse gave her a DVD which helped because she could see other children talking about having asthma. It helped her to get used to the idea.



00:12 03:02

Topic: Finding information about asthma  
See all of: Lisa

Yeah, I was in my last year of primary school, and I just remember really being out of breath quite a lot at PE and my mum brought me to the doctor, and they tested me or, you know, checked me, my peak flow, and then was just diagnosed then. So it was around, I suppose, September 1998 before I started secondary school, just

So you were about eleven.

Yeah.

And how did you feel when you were told?

I wasn't really too sure what asthma was. I just knew I couldn't breathe properly [laughs]. That was really it until it was just when I got older, and went in the secondary school and more people had it, and I realised, you know, that it was actually quite dangerous but I think then I panicked a bit more but, you know, when I was first diagnosed it didn't really didn't really annoy me [laughs].

# Filtering experiences by gender

## Living with Asthma



Thames Valley Primary Care Research Partnership



**EXPERIENCES BY TOPIC**

What is asthma? ▾ Symptoms and Causes ▾ Diagnosis ▾ Treatment ▾ Living with asthma ▾

Home » » Interviews by gender

### Interviewees by gender

Women with asthma

Men with asthma

**Peter**

Peter, age 62, was diagnosed with asthma at age 45. He is white British and married with two adult children. He is a retired IT professional. Peter's symptoms vary in severity, sometimes mild, and at other times quite debilitating.



[Read more](#)

**Tomas**

Tomas, age 16, was diagnosed with asthma at age 6 months. He is white and lives at home with his parents and brother. Tomas is a keen rugby player and thinks that his asthma is not stopping him from doing the sport he likes. His parents have always encouraged and supported him.



[Read more](#)

**Mark**

Mark, age 49, was diagnosed with asthma at age 6. He is white British and married with two children (aged 8 and 11) who also suffer from asthma. Mark himself has a number of health conditions as well as asthma, and at the moment is unable to work.



[Read more](#)

**Tim**

Tim, age 63, was diagnosed with asthma at age 25 although he had symptoms of asthma as a child. He is white British and lives with his wife and has spent some of his life living in Australia. He is an author.



[Read more](#)

Search

**EXPERIENCES BY GROUP**

- ◀ Gender
- ◀ Childhood onset/Adult onset
- ◀ Age diagnosed
- ◀ Age at Interview
- ◀ Time since Diagnosis

**HEALTH PROFESSIONALS TALK ABOUT ASTHMA: VIDEO CLIPS**



[Click Here...](#)

[Glossary](#)

**EXPERIENCES BY TOPIC**

**What is asthma**  
 Health professionals talk about Asthma  
 What is asthma?

**Symptoms and Causes**  
 Early signs and symptoms  
 Childhood onset  
 Adult onset  
 Triggers  
 What asthma feels like  
 Changing symptoms over time

**Diagnosis**  
 Being diagnosed with asthma

**Treatment**  
 Medication and treatment - inhalers  
 Medication and treatment - other treatments  
 Alternative and complementary therapies  
 Managing asthma - reviews and action plans  
 Managing asthma - adjusting medication and other self care strategies  
 Asthma attack and emergencies  
 Dealing with health professionals  
 Remembering to take medication

**Living with asthma**  
 Finding information about asthma  
 Emotions and coping  
 Asthma and the workplace  
 Finances and benefits  
 Exercise, diet, weight and other lifestyle issues  
 Support and support groups  
 Relationships, family and friends

**Messages**  
 Advice to others  
 Messages to health professionals





# Filtering experiences by age

## Living with Asthma



Thames Valley Primary Care Research Partnership



**HOME**

EXPERIENCES BY TOPIC

What is asthma? ▾ Symptoms and Causes ▾ Diagnosis ▾ Treatment ▾ Living with asthma ▾

Home » Interviews by age

### Interviewees by age

**Catherine**

Catherine, age 39, has had asthma (diagnosed at age 5) and a number of other health conditions since birth. She is white British, single and works with young people who have learning disabilities. During her childhood she found that she was unable to take part in many things and felt quite isolated.

[Read more](#)

**Jenny**

Jenny, age 34, was diagnosed with asthma at age 18. She is white British and lives at home with her parents who help care for her when she is unwell.

[Read more](#)

**Susan**

Susan, age 31, was diagnosed with asthma at 18. She is white British and single and enjoys a career as an academic researcher. Susan had hay fever as a child which became more severe when she was at secondary school and she was diagnosed with asthma.

[Read more](#)

**Philip**

Philip, age 32, was diagnosed with severe asthma at age 6. He is white Irish, single and works as a web developer. His asthma is generally only triggered by hay fever and so is usually at its worse during summer.

[Read more](#)

Under 18

18-30

31-40

41-50

51-60

61-70

Over 70

EXPERIENCES BY GROUP

- 4 Gender
- 4 Childhood onset/Adult onset
- 4 Age diagnosed
- 4 Age at Interview
- 4 Time since Diagnosis

HEALTH PROFESSIONALS TALK ABOUT ASTHMA: VIDEO CLIPS



Click Here...

[Glossary](#)

EXPERIENCES BY TOPIC

**What is asthma**

Health professionals talk about Asthma

What is asthma?

**Symptoms and Causes**

Early signs and symptoms

Childhood onset

Adult onset

Triggers

What asthma feels like

Changing symptoms over time

**Diagnosis**

Being diagnosed with asthma

**Treatment**

Medication and treatment - inhalers

Medication and treatment - other treatments

Alternative and complementary therapies

Managing asthma - reviews and action plans

Managing asthma - adjusting medication and other self care strategies

Asthma attack and emergencies

Dealing with health professionals

Remembering to take medication

**Living with asthma**

Finding information about asthma

Emotions and coping

Asthma and the workplace

Finances and benefits

Exercise, diet, weight and other lifestyle issues

Support and support groups

Relationships, family and friends

**Messages**

Advice to others

Messages to health professionals

# Health professionals talk about asthma

## Living with Asthma



Thames Valley Primary Care Research Partnership 

**HOME**

**EXPERIENCES BY TOPIC**

- What is asthma?
- Symptoms and Causes
- Diagnosis
- Treatment
- Living with asthma

Home » What is Asthma?

### What is Asthma?



Jon Ayres OBE – Professor of Environmental & Respiratory Medicine, Institute of Occupational and Environmental Medicine University of Birmingham



Dr Helen Salisbury – GP, Oxford



Jo Riley – Lead Respiratory Nurse, Churchill Hospital, Oxford

We have interviewed some health professionals to get professional perspectives on asthma it's treatments and management. Below you will find links to clips from health professionals.

What is asthma? Symptoms and causes Diagnosis Treatment Reviews & action plans Living with asthma

Click on the links below to view clips

- A doctor explains what Asthma is.
- A specialist nurse talks about the different types of asthma.

EXPERIENCES BY GROUP

- Gender
- Childhood onset/Adult onset
- Age diagnosed
- Age at Interview
- Time since Diagnosis

**HEALTH PROFESSIONALS TALK ABOUT ASTHMA: VIDEO CLIPS**



Click Here...

[Glossary](#)

**EXPERIENCES BY TOPIC**

**What is asthma**

Health professionals talk about Asthma

What is asthma?

**Symptoms and Causes**

Early signs and symptoms

Childhood onset

Adult onset

Triggers

What asthma feels like

Changing symptoms over time

**Diagnosis**

Being diagnosed with asthma

**Treatment**

Medication and treatment - inhalers

Medication and treatment – other treatments

Alternative and complementary therapies

Managing asthma – reviews and action plans

Managing asthma – adjusting medication and other self care strategies

Asthma attack and emergencies

Dealing with health professionals

Remembering to take medication

**Living with asthma**

Finding information about asthma

Emotions and coping

Asthma and the workplace

Finances and benefits

Exercise, diet, weight and other lifestyle issues

Support and support groups

Relationships, family and friends

**Messages**

Advice to others

Messages to health professionals

Research conducted by researchers at the University of Oxford, funded by the National Institute for Health Research. Information sources: Asthma UK, NHS Choices, Patient.co.uk, British Thoracic Society and British Lung Foundation.

This site is not intended to be a substitute for medical care. If you need more medical advice, please consult your GP or usual healthcare provider.



# Comparator homepage

Logout My account Comment on page Rate page

## Living with Asthma



Thames Valley Primary Care Research Partnership



**HOME**

**INFORMATION BY TOPIC**

- What is asthma?
- Symptoms and Causes
- Diagnosis
- Treatment
- Living with asthma

Home

Welcome to the Living with Asthma site



About five million people in the UK have asthma, a condition that affects the airways (the tubes that carry air in and out of the lungs). People with asthma have sensitive airways which become irritated in some situations, making it more difficult to breathe.

Researchers at the University of Oxford have put together this online resource for people living with asthma. We have grouped information under 10 topic headings (see left and above). You can also find out more on asthma by looking at the videos recorded with health professionals, on the right hand side.



HEALTH PROFESSIONALS TALK ABOUT ASTHMA: VIDEO CLIPS

Click Here...

Glossary

Material prepared by researchers at the University of Oxford, funded by the National Institute for Health Research. Information source: NHS Choices.

This site is not intended to be a substitute for medical care. If you need more medical advice, please consult your GP or usual healthcare provider.

Email address for all queries: [expert@phc.ox.ac.uk](mailto:expert@phc.ox.ac.uk)

# Information by topic

Logout My account Comment on page Rate page

## Living with Asthma



Thames Valley Primary Care Research Partnership 

**HOME**

**INFORMATION BY TOPIC**

What is asthma? Symptoms and Causes Diagnosis Treatment Living with asthma

**INFORMATION BY TOPIC**

**What is asthma**

What is asthma?  
Health professionals talk about Asthma

**Symptoms and Causes**

Symptoms of asthma  
When asthma gets worse  
Causes of asthma

**Diagnosis**

Diagnosing asthma

**Treatment**

What is good asthma care?  
Personal asthma action plan  
Taking asthma medicines  
Other treatments and add on therapy  
Side effects of treatments  
Complementary therapies

**Living with asthma**

Living with asthma  
Complications of asthma  
Occupational asthma  
Asthma and pregnancy  
Travelling with asthma  
Financial support  
Get in touch with others

**INFORMATION BY TOPIC**

Home » Symptoms of asthma

**Symptoms of asthma**

The symptoms of asthma include:

- feeling breathless (you may gasp for breath)
- a tight chest, like a band tightening around it
- wheezing, which makes a whistling sound when you breathe
- coughing, particularly at night and early morning
- attacks triggered by exercise, exposure to allergens and other triggers



You may have one or more of these symptoms. Symptoms that are worse during the night or with exercise can mean that asthma is getting worse. Talk to your doctor or asthma nurse about this.

HEALTH PROFESSIONALS TALK ABOUT ASTHMA: VIDEO CLIPS



Click Here...

Glossary

Material prepared by researchers at the University of Oxford, funded by the National Institute for Health Research. Information source: NHS Choices.

This site is not intended to be a substitute for medical care. If you need more medical advice, please consult your GP or usual healthcare provider.

Email address for all queries: [expert@phc.ox.ac.uk](mailto:expert@phc.ox.ac.uk)

# Information by topic

[Logout](#) [My account](#) [Comment on page](#) [Rate page](#)

## Living with Asthma



Thames Valley Primary Care Research Partnership 

**HOME**

**INFORMATION BY TOPIC**

- [What is asthma?](#)
- [Symptoms and Causes](#)
- [Diagnosis](#)
- [Treatment](#)
- [Living with asthma](#)

**What is good asthma care?**

The aim of treatment is to get your asthma under control and keep it that way. Everyone with asthma should be able to lead a full and unrestricted life. The treatments available for asthma are effective in most people and should enable you to be free from symptoms.

Your doctor or nurse will tailor your asthma treatment to your symptoms. Sometimes, you may need to be on higher levels of medication than at other times.

You should be offered:

- care at your GP surgery provided by doctors and nurses trained in asthma management.
- full information about your condition and how to control it
- involvement in making decisions about your treatment
- regular checks to ensure that your asthma is under good control and your treatment is right for you (which should be at least once a year)
- a written personal asthma action plan agreed with your doctor or nurse

**Be in control**

- Take time to find out about your asthma.
- Use a peak flow meter to monitor whether your asthma is getting better or worse.
- Visit your doctor at least once a year for a check-up and to discuss treatment options.

For more information see Asthma UK's website.

Material prepared by researchers at the University of Oxford, funded by the National Institute for Health Research. Information source: NHS Choices.

This site is not intended to be a substitute for medical care. If you need more medical advice, please consult your GP or usual healthcare provider.

Email address for all queries: [expert@phc.ox.ac.uk](mailto:expert@phc.ox.ac.uk)

**HEALTH PROFESSIONALS TALK ABOUT ASTHMA: VIDEO CLIPS**



[Click Here...](#)

[Glossary](#)

# Health professionals talk about asthma

Logout My account Comment on page Rate page

## Living with Asthma



Thames Valley Primary Care Research Partnership



**HOME**

**INFORMATION BY TOPIC**

- What is asthma?
- Health professionals talk about Asthma
- Symptoms and Causes**
- Symptoms of asthma
- When asthma gets worse
- Causes of asthma
- Diagnosis**
- Diagnosing asthma
- Treatment**
- What is good asthma care?
- Personal asthma action plan
- Taking asthma medicines
- Other treatments and add on therapy
- Side effects of treatments
- Complementary therapies
- Living with asthma**
- Living with asthma
- Complications of asthma
- Occupational asthma
- Asthma and pregnancy
- Travelling with asthma
- Financial support
- Get in touch with others

**INFORMATION BY TOPIC**

What is asthma? ▾ Symptoms and Causes ▾ Diagnosis ▾ Treatment ▾ Living with asthma ▾

Home » Health professionals talk about Asthma

### Health professionals talk about Asthma

|                                                                                   |                                                                                                                                                  |
|-----------------------------------------------------------------------------------|--------------------------------------------------------------------------------------------------------------------------------------------------|
|  | Jon Ayres OBE – Professor of Environmental & Respiratory Medicine, Institute of Occupational and Environmental Medicine University of Birmingham |
|  | Dr Helen Salisbury – GP, Oxford                                                                                                                  |
|  | Jo Riley – Lead Respiratory Nurse, Churchill Hospital, Oxford                                                                                    |

We have interviewed some health professionals to get professional perspectives on asthma, its treatments and management. Below you will find links to clips from health professionals.

What is asthma? Symptoms and causes Diagnosis Treatment Reviews & action plans Living with asthma

Search

**HEALTH PROFESSIONALS TALK ABOUT ASTHMA: VIDEO CLIPS**



Click Here...

Glossary

Material prepared by researchers at the University of Oxford, funded by the National Institute for Health Research. Information source: NHS Choices.

This site is not intended to be a substitute for medical care. If you need more medical advice, please consult your GP or usual healthcare provider.

Email address for all queries: [expert@phc.ox.ac.uk](mailto:expert@phc.ox.ac.uk)
