# Supplementary material for: Randomised feasibility study of a novel experience-based internet intervention to support self-management in chronic asthma
Source: PubMed Central journal article supplement — BMJ Open. 2016 Dec 26;6(12):e013401. doi: 10.1136/bmjopen-2016-013401 (PMC5223671; doi:10.1136/bmjopen-2016-013401), 2016-12-26

SUPPLEMENTARY FIGURE 1 :Dot plot graphs of total number of logins by randomised group for asthma cohort (with extreme values). The 'red' line represents the median with low and upper quartiles represented by the dotted lines.

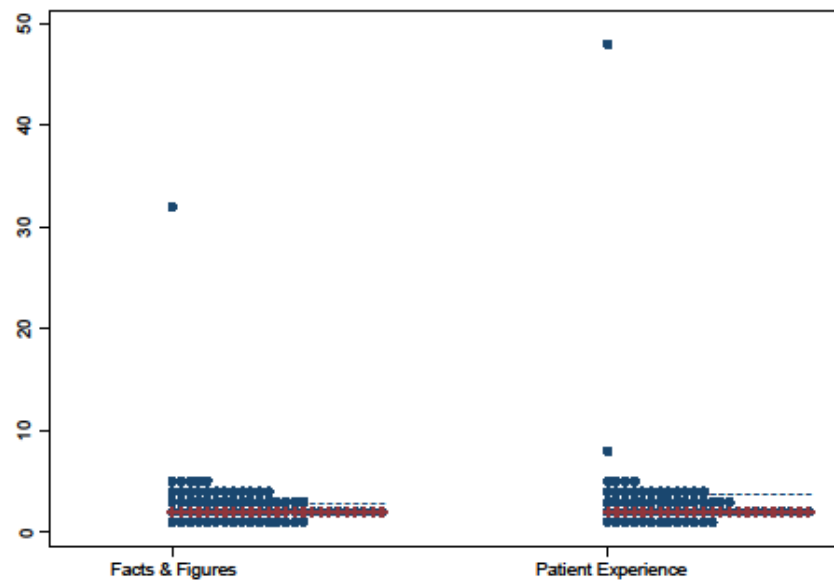

SUPPLEMENTARY FIGURE 2 :Dot plot graphs of total duration (mins) on website by randomised group for asthma cohort (with extreme values). The 'red' line represents the median with low and upper quartiles represented by the dotted lines.

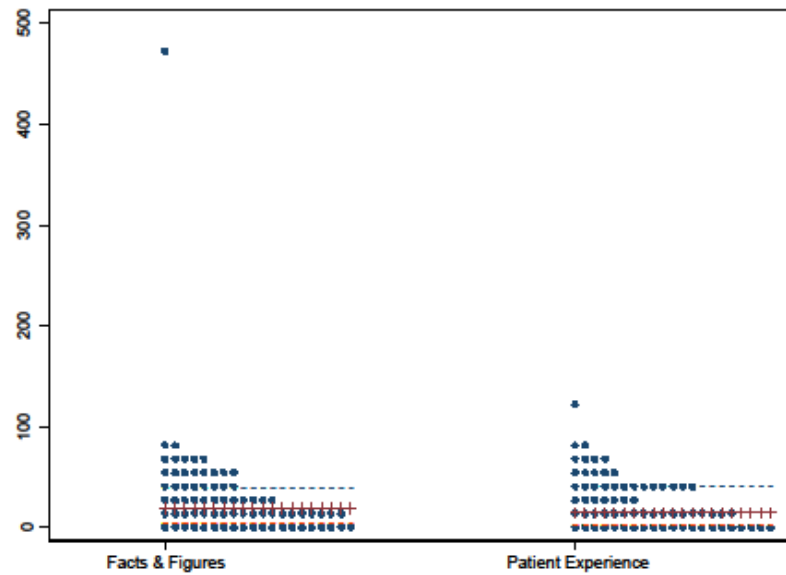

Supplement: bmjopen-2016-013401supp_figures.pdf [file bmjopen-2016-013401supp_figures.pdf]
